# Supplementary material for: Changes in the intrinsic severity of severe acute respiratory syndrome coronavirus 2 according to the emerging variant: a nationwide study from February 2020 to June 2022, including comparison with vaccinated populations
Source: Springer Nature journal article supplement (doi:10.1186/s12879-023-08869-7), 2024-01-02
Supplement: 12879_2023_8869_MOESM1_ESM.pdf [file 12879_2023_8869_MOESM1_ESM.pdf]

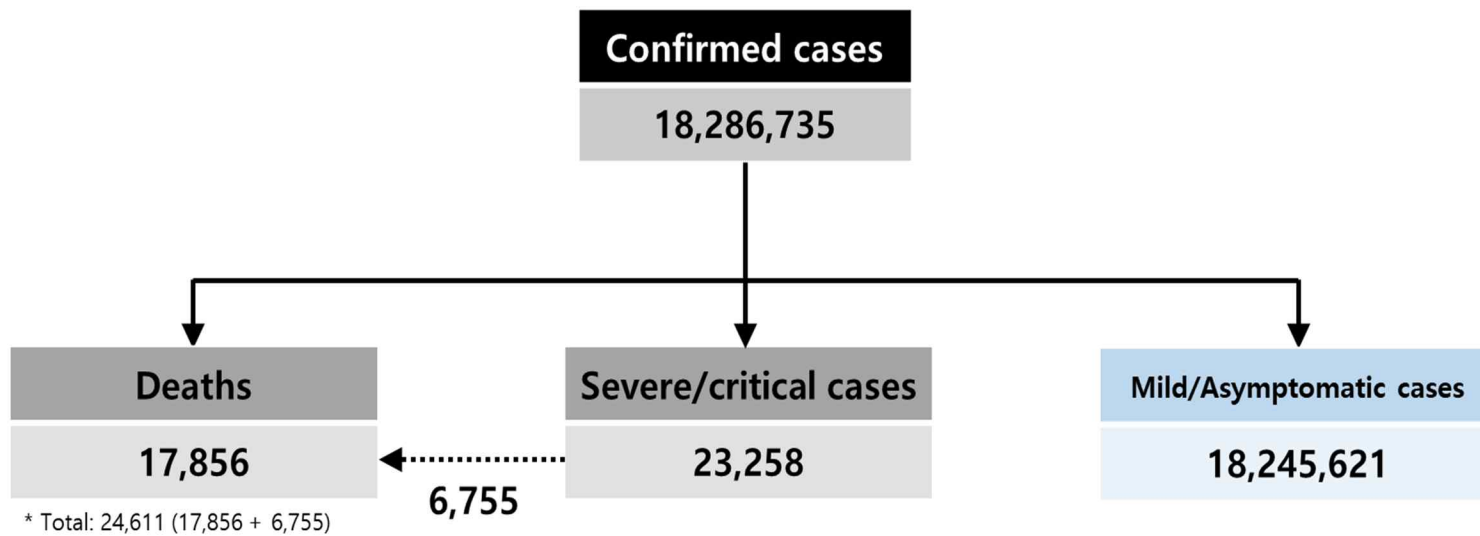

**Additional file 1.** The number of confirmed cases, including severe/critical cases and deaths.
