# Supplementary material for: Changes in the intrinsic severity of severe acute respiratory syndrome coronavirus 2 according to the emerging variant: a nationwide study from February 2020 to June 2022, including comparison with vaccinated populations
Source: Springer Nature journal article supplement (doi:10.1186/s12879-023-08869-7), 2024-01-02
Supplement: 12879_2023_8869_MOESM2_ESM.pdf [file 12879_2023_8869_MOESM2_ESM.pdf]

**Additional file 2.** Age-standardized case severity rates and case fatality rates by period regarding vaccination and circulating variant of SARS-CoV-2 (%).

| Vaccination status                 | Total             | Pre-vaccination   | After-vaccination  |                   |                   |
|------------------------------------|-------------------|-------------------|--------------------|-------------------|-------------------|
|                                    |                   |                   | Pre-delta dominant | Delta dominant    | Omicron dominant  |
| <b>Case severity rate (95% CI)</b> |                   |                   |                    |                   |                   |
| <b>Total</b>                       | 0.22 (0.22, 0.23) | 2.49 (2.41, 2.57) | 2.06 (1.95, 2.17)  | 1.93 (1.89, 1.97) | 0.14 (0.14, 0.15) |
| Unvaccinated                       | 1.66 (1.64, 1.68) | 2.49 (2.41, 2.57) | 2.12 (2.01, 2.24)  | 5.51 (5.37, 5.65) | 0.94 (0.92, 0.97) |
| Partial vaccination                | 0.94 (0.89, 0.98) | -                 | 1.63 (1.26, 2.06)  | 1.67 (1.53, 1.83) | 0.7 (0.65, 0.75)  |
| Complete vaccination               | 0.45 (0.44, 0.46) | -                 | 0.64 (0.10, 2.12)  | 0.89 (0.86, 0.92) | 0.32 (0.31, 0.33) |
| Booster vaccination                | 0.07 (0.07, 0.07) | -                 | -                  | 0.56 (0.42, 0.72) | 0.07 (0.07, 0.07) |
| <b>Case fatality rate (95% CI)</b> |                   |                   |                    |                   |                   |
| <b>Total</b>                       | 0.13 (0.13, 0.14) | 1.17 (1.12, 1.23) | 0.56 (0.50, 0.62)  | 0.83 (0.81, 0.85) | 0.10 (0.10, 0.10) |
| Unvaccinated                       | 0.82 (0.80, 0.84) | 1.17 (1.12, 1.23) | 0.60 (0.53, 0.67)  | 2.49 (2.40, 2.59) | 0.63 (0.61, 0.64) |
| Partial vaccination                | 0.51 (0.48, 0.55) | -                 | 0.27 (0.15, 0.45)  | 0.82 (0.71, 0.94) | 0.50 (0.46, 0.54) |
| Complete vaccination               | 0.29 (0.28, 0.29) | -                 | 0.18 (0.02, 0.67)  | 0.45 (0.43, 0.47) | 0.23 (0.23, 0.24) |
| Booster vaccination                | 0.05 (0.05, 0.05) | -                 | -                  | 0.25 (0.17, 0.34) | 0.05 (0.05, 0.05) |

*SARS-CoV-2* Severe acute respiratory syndrome coronavirus 2, *CI* Confidence Intervals
