# Supplementary material for: Changes in the intrinsic severity of severe acute respiratory syndrome coronavirus 2 according to the emerging variant: a nationwide study from February 2020 to June 2022, including comparison with vaccinated populations
Source: Springer Nature journal article supplement (doi:10.1186/s12879-023-08869-7), 2024-01-02
Supplement: 12879_2023_8869_MOESM3_ESM.pdf [file 12879_2023_8869_MOESM3_ESM.pdf]

**Additional file 3.** Age-standardized case severity rates and case fatality rates during weeks with SARS-CoV-2 variants detected in over 90% of test samples (%).

| Vaccination status                 | Delta detected over 90% | Omicron detected over 90% |
|------------------------------------|-------------------------|---------------------------|
| <b>Case severity rate (95% CI)</b> |                         |                           |
| <b>Total</b>                       | 1.84 (1.81, 1.88)       | 0.14 (0.14, 0.14)         |
| Unvaccinated                       | 5.50 (5.34, 5.66)       | 0.92 (0.90, 0.94)         |
| Partial vaccination                | 1.72 (1.56, 1.90)       | 0.68 (0.63, 0.73)         |
| Complete vaccination               | 0.88 (0.85, 0.91)       | 0.31 (0.30, 0.32)         |
| Booster vaccination                | 0.50 (0.31, 0.75)       | 0.07 (0.07, 0.07)         |
| <b>Case fatality rate (95% CI)</b> |                         |                           |
| <b>Total</b>                       | 0.82 (0.79, 0.84)       | 0.10 (0.10, 0.10)         |
| Unvaccinated                       | 2.55 (2.44, 2.66)       | 0.61 (0.60, 0.63)         |
| Partial vaccination                | 0.85 (0.72, 0.99)       | 0.49 (0.45, 0.54)         |
| Complete vaccination               | 0.45 (0.43, 0.47)       | 0.23 (0.22, 0.24)         |
| Booster vaccination                | 0.28 (0.15, 0.45)       | 0.05 (0.05, 0.05)         |

*SARS-CoV-2* Severe acute respiratory syndrome coronavirus 2, *CI* Confidence Intervals
