# Supplementary material for: Changes in the intrinsic severity of severe acute respiratory syndrome coronavirus 2 according to the emerging variant: a nationwide study from February 2020 to June 2022, including comparison with vaccinated populations
Source: Springer Nature journal article supplement (doi:10.1186/s12879-023-08869-7), 2024-01-02
Supplement: 12879_2023_8869_MOESM4_ESM.pdf [file 12879_2023_8869_MOESM4_ESM.pdf]

**Additional file 4.** Monthly age-standardized case severity rates and case fatality rates

| Year-Month | Age-standardized case severity rate (%) |            |          |         | Age-standardized case fatality rate (%) |            |          |         |
|------------|-----------------------------------------|------------|----------|---------|-----------------------------------------|------------|----------|---------|
|            | Unvaccinated                            | Vaccinated |          |         | Unvaccinated                            | Vaccinated |          |         |
|            |                                         | Partial    | Complete | Booster |                                         | Partial    | Complete | Booster |
| 2020       | 2                                       | 3.30       |          |         | 2.02                                    |            |          |         |
|            | 3                                       | 2.53       |          |         | 1.72                                    |            |          |         |
|            | 4                                       | 2.62       |          |         | 1.69                                    |            |          |         |
|            | 5                                       | 2.08       |          |         | 0.97                                    |            |          |         |
|            | 6                                       | 3.40       |          |         | 0.73                                    |            |          |         |
|            | 7                                       | 2.69       |          |         | 0.64                                    |            |          |         |
|            | 8                                       | 2.74       |          |         | 1.02                                    |            |          |         |
|            | 9                                       | 3.17       |          |         | 0.93                                    |            |          |         |
|            | 10                                      | 2.60       |          |         | 0.91                                    |            |          |         |
|            | 11                                      | 2.57       |          |         | 1.06                                    |            |          |         |
|            | 12                                      | 2.70       |          |         | 1.46                                    |            |          |         |
|            | 2021                                    | 1          | 2.07     |         |                                         | 0.88       |          |         |
| 2          |                                         | 2.03       |          |         | 0.92                                    |            |          |         |
| 3          |                                         | 1.44       | 0.00     |         | 0.55                                    | 0.00       |          |         |
| 4          |                                         | 1.79       | 0.32     |         | 0.52                                    | 0.32       |          |         |
| 5          |                                         | 2.12       | 1.22     | 0.00    | 0.65                                    | 0.08       | 0.00     |         |
| 6          |                                         | 2.82       | 2.13     | 0.54    | 0.71                                    | 0.21       | 0.54     |         |
| 7          |                                         | 5.09       | 1.12     | 1.15    | 1.38                                    | 0.31       | 0.12     |         |
| 8          |                                         | 4.81       | 1.84     | 0.87    | 1.62                                    | 0.60       | 0.42     |         |
| 9          |                                         | 5.14       | 1.80     | 0.90    | 1.98                                    | 0.76       | 0.28     |         |
| 10         |                                         | 5.79       | 2.29     | 1.01    | 2.37                                    | 0.99       | 0.42     |         |
| 11         |                                         | 5.95       | 2.59     | 1.10    | 2.81                                    | 1.61       | 0.57     | 0.00    |
| 12         |                                         | 5.50       | 1.88     | 0.86    | 2.82                                    | 1.23       | 0.48     | 0.27    |
| 2022       | 1                                       | 3.89       | 2.39     | 0.92    | 1.97                                    | 1.21       | 0.52     | 0.15    |
|            | 2                                       | 1.33       | 0.99     | 0.49    | 0.82                                    | 0.61       | 0.32     | 0.08    |
|            | 3                                       | 0.91       | 0.69     | 0.30    | 0.65                                    | 0.55       | 0.24     | 0.06    |
|            | 4                                       | 0.74       | 0.50     | 0.24    | 0.49                                    | 0.35       | 0.17     | 0.04    |
|            | 5                                       | 0.76       | 0.42     | 0.28    | 0.41                                    | 0.27       | 0.17     | 0.04    |
|            | 6                                       | 0.76       | 0.65     | 0.19    | 0.41                                    | 0.36       | 0.06     | 0.05    |
